# Supplementary material for: Enhancing SO 3 hydrolysis and nucleation: the role of formic sulfuric anhydride
Source: Copernicus journal article supplement (doi:10.5194/acp-25-5695-2025), 2025-06-11
Supplement: Supplementary file 2 [file acp-25-5695-2025-supplement.zip]

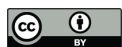

*Supplement of*

## **Enhancing SO<sub>3</sub> hydrolysis and nucleation: the role of formic sulfuric anhydride**

**Rui Wang et al.**

*Correspondence to:* Xiaohui Ma (mxhsdu@163.com) and Tianlei Zhang (ztianlei88@163.com)

- [acp-25-5695-2025-supplement-title-page.pdf](#)
- [egusphere-2024-3275-supplement-version4-4.pdf](#)
- [movie S1.mp4](#)

The copyright of individual parts of the supplement might differ from the article licence.
